# Supplementary material for: Genomic analysis of multidrug-resistant clinical Enterococcus faecalis isolates for antimicrobial resistance genes and virulence factors from the western region of Saudi Arabia
Source: Springer Nature journal article supplement (doi:10.1186/s13756-019-0508-4), 2019-03-25
Supplement: MOESM1 [file 16574750]

## Supplementary Data

### Genomic analysis of multidrug-resistant clinical *Enterococcus faecalis* isolates for antimicrobial resistance genes and virulence factors from the western region of Saudi Arabia

Muhammad Farman<sup>†1,2</sup>, Muhammad Yasir<sup>1,6†\*</sup>, Rashad R. Al-Hindi<sup>2</sup>, Suha A. Farraj<sup>1</sup>, Asif A. Jiman-Fatani<sup>3,4</sup>, Maha Alawi<sup>3,5</sup>, Esam I. Azhar<sup>1,6</sup>

<sup>1</sup>Special Infectious Agents Unit, King Fahd Medical Research Center, King Abdulaziz University, Jeddah, Saudi Arabia

<sup>2</sup>Biology Department, Faculty of Science, King Abdulaziz University, Jeddah 21589, Saudi Arabia

<sup>3</sup>Department of Medical Microbiology and Parasitology, Faculty of Medicine, King Abdulaziz University, Jeddah, Saudi Arabia

<sup>4</sup>Clinical and Molecular Microbiology Laboratories, King Abdulaziz University Hospital, Jeddah, Saudi Arabia

<sup>5</sup>Infection Control & Environmental Health Unit, King Abdulaziz University Hospital, King Abdulaziz University, Jeddah, Saudi Arabia

<sup>6</sup>Department of Medical Laboratory Technology, Faculty of Applied Medical Sciences, King Abdulaziz University, Jeddah, Saudi Arabia

<sup>†</sup>Authors equally contributed in this study

**\*Corresponding author:** Muhammad Yasir

Special Infectious Agents Unit, King Fahd Medical Research Center, King Abdulaziz University, Jeddah-21589, Saudi Arabia

Email: yasirkhattak.mrl@gmail.com

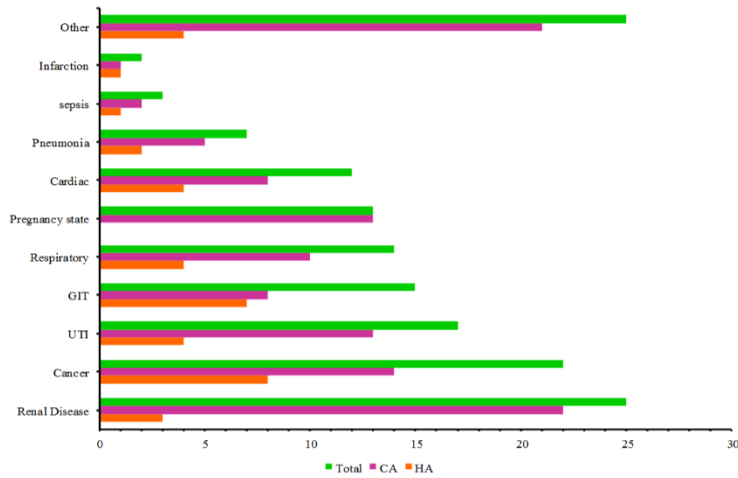

**Figure S1.** Percentage distribution of hospital-acquired infection (HA), and community-acquired infection (CA) infections of *E. faecalis* in different disease patients.

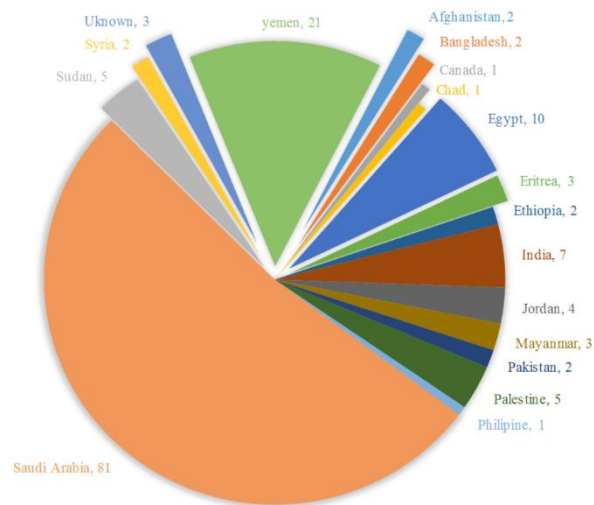

**Figure S2.** Distribution of the *E. faecalis* isolates analyzed in this study based on nationalities. The number of isolates is mentioned with the country name.

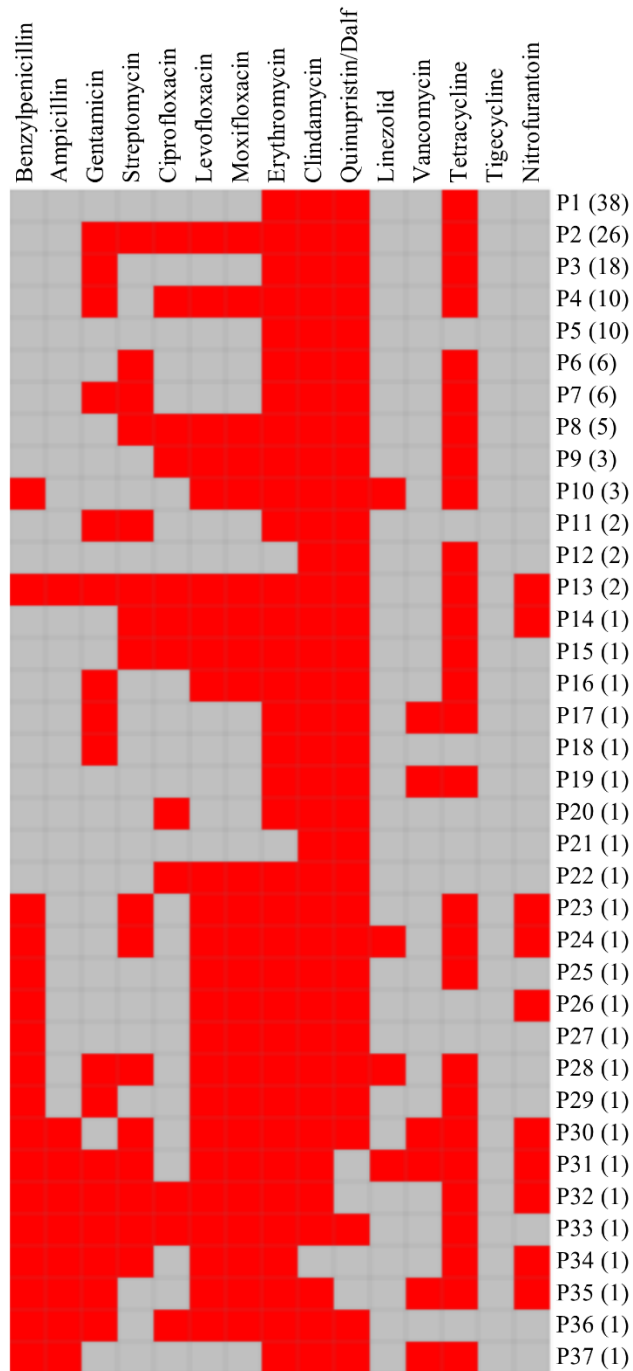

**Figure S3.** Heat map of antimicrobial resistance and susceptibility patterns among the 155 *E. faecalis* isolates.

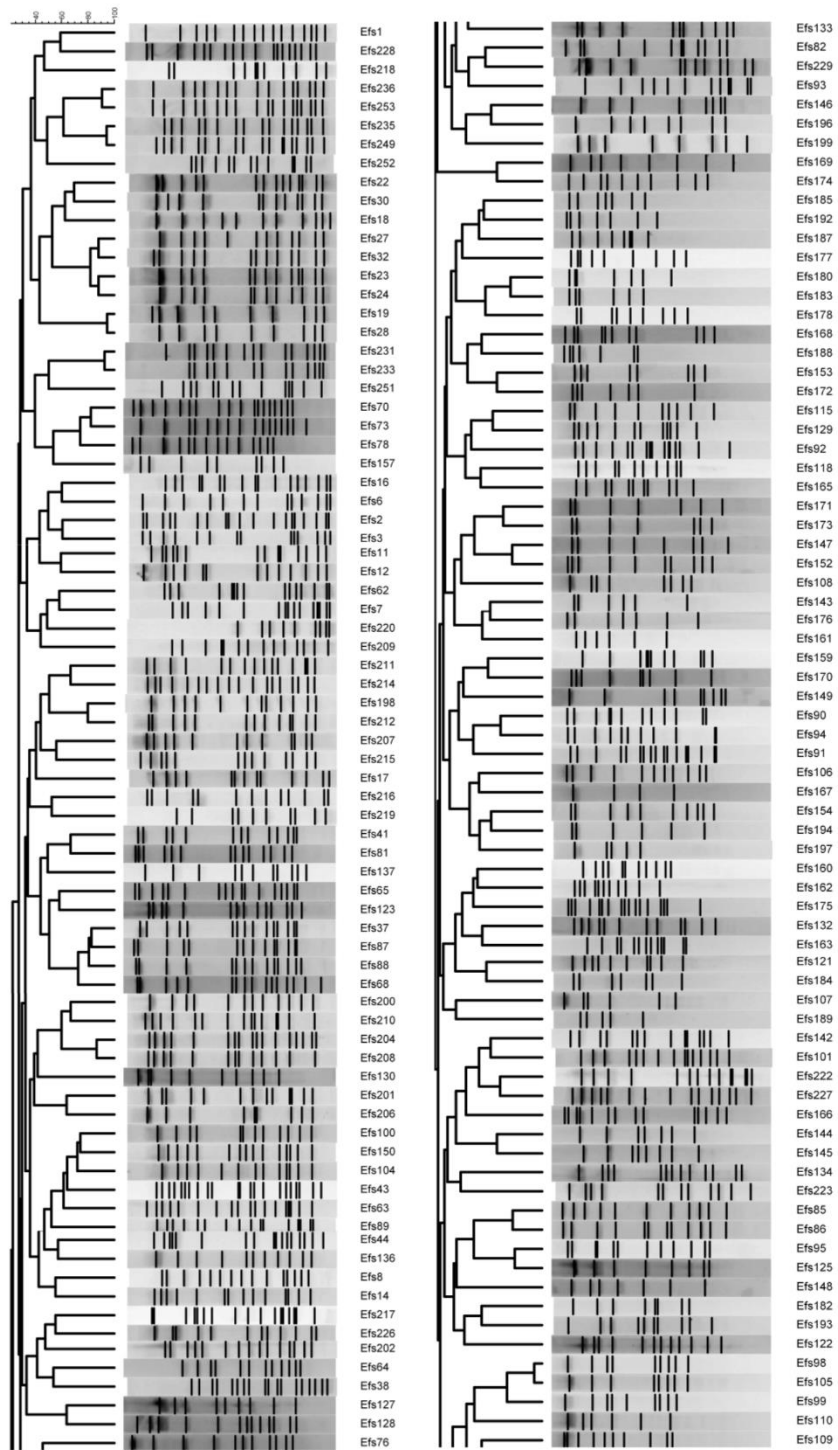

**Figure S4.** UPGMA dendrogram of pulsed-field gel electrophoresis (PFGE) bands patterns from the clinical isolates of *E. faecalis*.

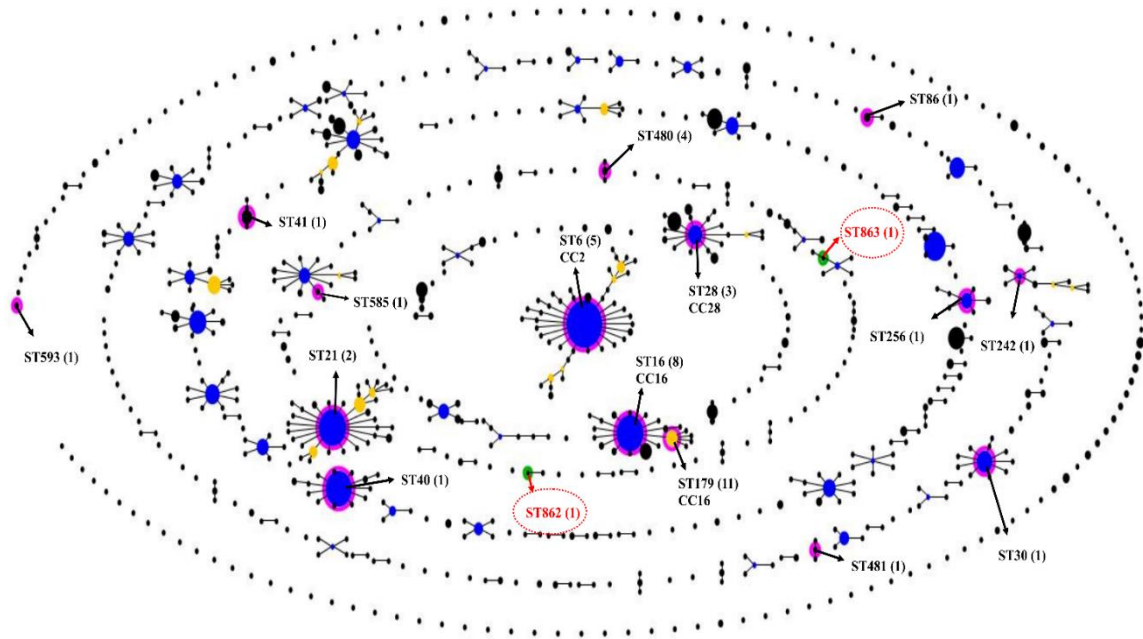

**Figure S5.** eBURST analysis of the STs from *E. faecalis* isolates. The pink nodes indicate the STs detected in this study that were present in the MLST database. Green nodes indicate the novel STs detected in this study and red circled.

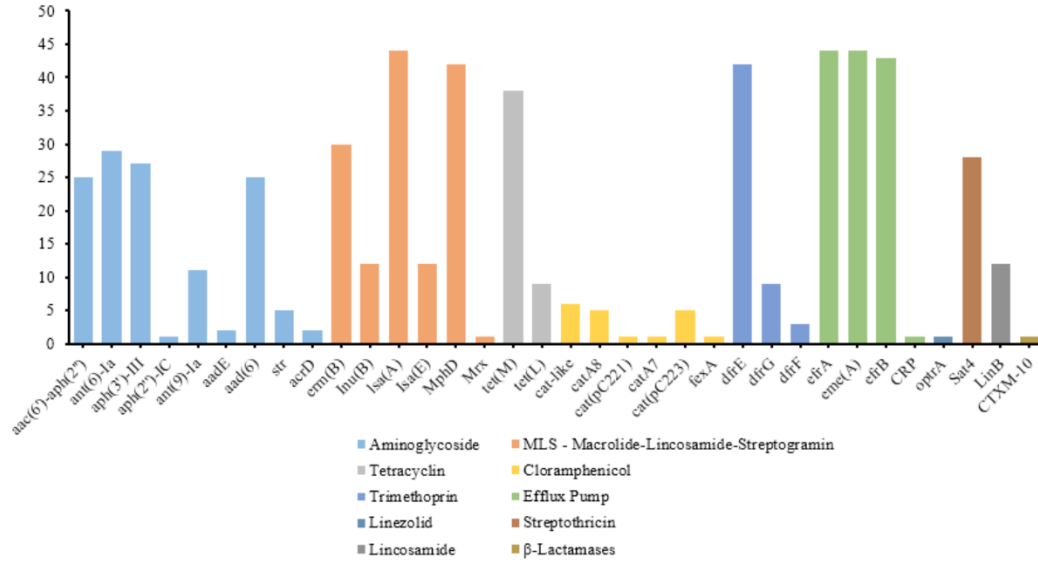

**Figure S6.** Distribution of antimicrobial resistance genes among clinical *E. faecalis* isolates. Total 34 ARGs and variants were retrieved from the genomes sequence of the 44 isolates. The y-axis values are expressed in number.

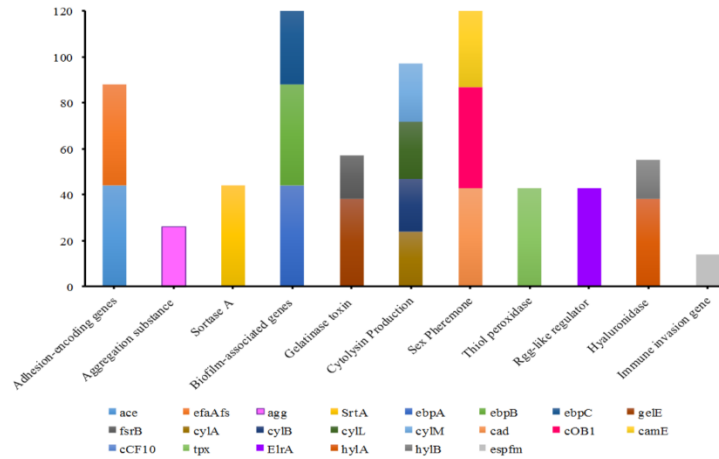

**Figure S7.** Distribution of virulence genes retrieved from the genomes sequence of *E. faecalis* isolates. Total 22 virulence-associated genes were identified in this study, and among them, six genes (*cOB1*, *SrtA*, *ebpB*, *ebpA*, *efaAfs*, and *ace*) were commonly found in the 44 isolates. The y-axis values are expressed in number.

**Table S1.** Distribution of *E. faecalis* isolates according to demographic and clinical data.

|                       | Source          | Total (155) | Inp n = 102 (65.8%) | Outp n = 53 (34.2%) | P-value | HA n = 38 (24.5%) | CA n = 117 (75.5%) | P-value |
|-----------------------|-----------------|-------------|---------------------|---------------------|---------|-------------------|--------------------|---------|
| <b>Gender</b>         | Male            | 83 (53.5)   | 62 (60.7)           | 21 (39.6)           | 0.01    | 24 (63.2)         | 59 (50.4)          | 0.17    |
|                       | Female          | 72 (46.4)   | 40 (39.2)           | 32 (60.3)           |         | 14 (36.9)         | 58 (49.5)          |         |
| <b>Age</b>            | ≤ 1             | 23 (14.8)   | 19 (5.8)            | 4 (7.5)             | 0.07    | 7 (18.4)          | 16 (13.6)          | 0.61    |
|                       | 2-11            | 13 (8.3)    | 8 (7.8)             | 5 (9.4)             |         | 5 (13.5)          | 21 (17.9)          |         |
|                       | 12-18           | 3 (1.9)     | 2 (1.9)             | 1 (1.9)             |         | 1 (2.6)           | 2 (1.8)            |         |
|                       | 19-50           | 49 (31.6)   | 25 (24.5)           | 24 (45.2)           |         | 9 (23.6)          | 40 (34.1)          |         |
|                       | >50             | 67 (43.2)   | 48 (47)             | 19 (35.8)           |         | 19 (50)           | 48 (41.1)          |         |
| <b>Nationality</b>    | Saudis          | 81 (52.2)   | 48 (47)             | 33 (62.2)           | 0.17    | 17 (44.7)         | 64 (54.7)          | 0.04    |
|                       | Yemini          | 21 (13.5)   | 16 (15.6)           | 5 (9.4)             |         | 3 (7.9)           | 18 (15.3)          |         |
|                       | Egyptian        | 10 (6.4)    | 6 (5.8)             | 4 (7.5)             |         | 3 (7.9)           | 7 (6)              |         |
|                       | Indian          | 7 (4.5)     | 7 (6.8)             | 0                   |         | 3 (7.9)           | 4 (3.4)            |         |
|                       | Palestinian     | 5 (3.2)     | 3 (2.9)             | 2 (3.8)             |         | 3 (7.9)           | 2 (1.8)            |         |
|                       | Eritrean        | 3 (1.9)     | 2 (1.9)             | 1 (1.9)             |         | 1 (2.6)           | 2 (1.8)            |         |
|                       | Bangladeshi     | 2 (1.2)     | 1 (0.9)             | 1 (1.9)             |         | 2 (5.2)           | 0                  |         |
|                       | Others          | 26 (16.7)   | 19 (18.6)           | 7 (13.2)            |         | 6 (15.7)          | 20 (17.1)          |         |
| <b>Specimens Type</b> | Urine-midstream | 58 (37.4)   | 35 (34.3)           | 23 (43.3)           | 0.03    | 9 (23.6)          | 49 (41.8)          | 0.05    |
|                       | Urine-catheter  | 49 (31.6)   | 35 (34.3)           | 14 (26.4)           |         | 14 (36.9)         | 35 (29.9)          |         |
|                       | Wound swab      | 13 (8.3)    | 5 (4.9)             | 8 (15.1)            |         | 4 (10.5)          | 9 (7.7)            |         |
|                       | Blood           | 11 (7.1)    | 10 (9.8)            | 1 (1.9)             |         | 6 (15.7)          | 5 (4.3)            |         |
|                       | Others          | 24 (15.4)   | 17 (16.6)           | 7 (13.2)            |         | 5 (13.5)          | 19 (16.2)          |         |

Inp, Inpatient; Outp, Outpatient; HA, Hospital-acquired; CA, Community-acquired.

**Table S2.** Distribution of insertion sequences (ISs) in the *E. faecalis* genomes.

| <b>Isolate Number</b> | <b>STs</b> | <b>Insertion sequences</b> | <b>IS Families</b> |
|-----------------------|------------|----------------------------|--------------------|
| Efs6                  | ST480      | <i>ISEf1</i>               | IS256              |
| Efs7                  | ST481      | No hits found              | -                  |
| Efs14                 | ST21       | <i>IS6770</i>              | IS30               |
| Efs16                 | ST30       | <i>IS6770</i>              | IS30               |
| Efs24                 | ST593      | <i>IS16</i>                | IS256              |
| Efs30                 | ST41       | <i>IS1062</i>              | IS30               |
| Efs41                 | ST21       | <i>IS6770</i>              | IS30               |
| Efs44                 | ST16       | <i>ISEf1</i>               | IS256              |
| Efs62                 | ST179      | <i>IS6770</i>              | IS30               |
| Efs76                 | ST179      | <i>IS6770</i>              | IS30               |
| Efs88                 | ST480      | <i>ISEf1</i>               | IS256              |
| Efs93                 | ST480      | <i>ISEf1</i>               | IS256              |
| Efs107                | ST179      | <i>IS6770</i>              | IS30               |
| Efs110                | ST16       | <i>ISEf1</i>               | IS256              |
| Efs122                | ST179      | <i>IS6770</i>              | IS30               |
| Efs128                | ST16       | <i>ISEf1</i>               | IS256              |
| Efs133                | ST40       | <i>IS6770</i>              | IS30               |
| Efs136                | ST179      | <i>IS6770</i>              | IS30               |
| Efs142                | ST28       | <i>ISEnfa2</i>             | IS1182             |
| Efs144                | ST86       | <i>ISEnfa364</i>           | IS30               |
| Efs145                | ST28       | <i>ISEnfa2</i>             | IS1182             |
| Efs149                | ST179      | <i>IS6770</i>              | IS30               |
| Efs153                | ST6        | <i>IS6770</i>              | IS30               |
| Efs154                | ST179      | <i>IS6770</i>              | IS30               |
| Efs162                | ST862      | <i>IS6770</i>              | IS30               |
| Efs163                | ST16       | <i>ISEf1</i>               | IS256              |
| Efs165                | ST179      | <i>IS6770</i>              | IS30               |
| Efs166                | ST6        | <i>IS6770</i>              | IS30               |
| Efs171                | ST28       | <i>ISEnfa2</i>             | IS1182             |
| Efs173                | ST863      | <i>ISEf1</i>               | IS256              |
| Efs175                | ST16       | <i>ISEf1</i>               | IS256              |
| Efs178                | ST16       | <i>ISEf1</i>               | IS256              |
| Efs180                | ST179      | <i>IS6770</i>              | IS30               |



|        |       |                  |       |
|--------|-------|------------------|-------|
| Efs183 | ST585 | <i>ISEf1</i>     | IS256 |
| Efs185 | ST16  | <i>ISEf1</i>     | IS256 |
| Efs187 | ST179 | <i>IS6770</i>    | IS30  |
| Efs189 | ST179 | <i>IS6770</i>    | IS30  |
| Efs196 | ST6   | <i>ISEf1</i>     | IS256 |
| Efs197 | ST6   | <i>IS6770</i>    | IS30  |
| Efs208 | ST480 | <i>ISEf1</i>     | IS256 |
| Efs210 | ST16  | <i>ISEf1</i>     | IS256 |
| Efs212 | ST6   | <i>IS6770</i>    | IS30  |
| Efs215 | ST256 | <i>IS1062</i>    | IS30  |
| Efs216 | ST242 | <i>ISEnfa364</i> | IS30  |
